# Supplementary material for: CLC-Pred: A freely available web-service for in silico prediction of human cell line cytotoxicity for drug-like compounds
Source: PubMed Central journal article supplement (PMC5784992; doi:10.1371/journal.pone.0191838), 2018-01-25
Supplement: pone.0191838.s002.pdf [file pone.0191838.s002.pdf]

**S1 Table.**

| No | Cell line         | Type of cell line                                     | Organ/ Tissue | N    | AUC LOO CV | AUC 20-fold CV |
|----|-------------------|-------------------------------------------------------|---------------|------|------------|----------------|
| 1  | 5637              | Urothelial bladder carcinoma                          | Urinary tract | 157  | 0.849      | 0.836          |
| 2  | 1A9               | Ovarian adenocarcinoma                                | Ovary         | 85   | 0.988      | 0.988          |
| 3  | 1A9/ptx-10        | Ovarian adenocarcinoma                                | Ovary         | 36   | 0.990      | 0.991          |
| 4  | 1A9/ptx-22        | Ovarian adenocarcinoma                                | Ovary         | 24   | 0.993      | 0.993          |
| 5  | 786-0             | Renal carcinoma                                       | Kidney        | 593  | 0.871      | 0.865          |
| 6  | 833K              | Testicular embryonal carcinoma                        | Testicle      | 16   | 0.986      | 0.986          |
| 7  | 8505C             | Thyroid gland undifferentiated (anaplastic) carcinoma | Thyroid       | 116  | 0.843      | 0.831          |
| 8  | A 172             | Glioblastoma                                          | Brain         | 54   | 0.998      | 0.998          |
| 9  | A-375             | Malignant melanoma                                    | Skin          | 759  | 0.940      | 0.939          |
| 10 | A-427             | Lung carcinoma                                        | Lung          | 202  | 0.871      | 0.864          |
| 11 | A-431             | Epidermoid carcinoma                                  | Skin          | 790  | 0.928      | 0.926          |
| 12 | A121              | Ovarian carcinoma                                     | Ovary         | 80   | 1.000      | 1.000          |
| 13 | A2058             | Melanoma                                              | Skin          | 80   | 0.822      | 0.806          |
| 14 | A2780             | Ovarian carcinoma                                     | Ovary         | 1964 | 0.934      | 0.933          |
| 15 | A2780cisR         | Cisplatin-resistant ovarian carcinoma                 | Ovary         | 30   | 0.925      | 0.924          |
| 16 | A498              | Renal carcinoma                                       | Kidney        | 595  | 0.876      | 0.877          |
| 17 | A549              | Lung carcinoma                                        | Lung          | 6627 | 0.865      | 0.865          |
| 18 | ACHN              | Papillary renal carcinoma                             | Kidney        | 876  | 0.898      | 0.896          |
| 19 | ADR5000           | Childhood T acute lymphoblastic leukemia              | Blood         | 3    | 0.921      | 0.923          |
| 20 | AGS               | Gastric adenocarcinoma                                | Stomach       | 228  | 0.873      | 0.866          |
| 21 | ASPC1             | Pancreatic ductal adenocarcinoma                      | Pancreas      | 94   | 0.959      | 0.959          |
| 22 | Bcap37            | Breast adenocarcinoma                                 | Breast        | 39   | 0.955      | 0.956          |
| 23 | BE                | Colon adenocarcinoma                                  | Colon         | 30   | 1.000      | 0.999          |
| 24 | BEL-7404          | Hepatocellular carcinoma                              | Liver         | 5    | 1.000      | 1.000          |
| 25 | BE-NQ             | Colon adenocarcinoma                                  | Colon         | 15   | 0.999      | 0.999          |
| 26 | BGC-823           | Stomach adenocarcinoma                                | Stomach       | 219  | 0.949      | 0.949          |
| 27 | BT-474            | Breast ductal carcinoma                               | Breast        | 403  | 0.940      | 0.940          |
| 28 | BT-549            | Breast ductal carcinoma                               | Breast        | 444  | 0.870      | 0.871          |
| 29 | BXPC-3            | Pancreatic adenocarcinoma                             | Pancreas      | 274  | 0.950      | 0.948          |
| 30 | Bel-7402          | Hepatoma                                              | Liver         | 533  | 0.941      | 0.940          |
| 31 | C180-13S          | Ovarian carcinoma                                     | Ovary         | 11   | 0.999      | 0.999          |
| 32 | C8166             | Leukemic T-cells                                      | Blood         | 100  | 0.837      | 0.841          |
| 33 | Caco-2            | Colon adenocarcinoma                                  | Colon         | 182  | 0.924      | 0.921          |
| 34 | CAKI-1            | Kidney carcinoma                                      | Kidney        | 592  | 0.860      | 0.857          |
| 35 | CCRF-CEM          | Childhood T acute lymphoblastic leukemia              | Blood         | 2643 | 0.911      | 0.911          |
| 36 | CCRF-CEM/VCR-1000 | T-cell leukaemia                                      | Blood         | 62   | 0.990      | 0.991          |
| 37 | CCRF-HSB-2        | Childhood T acute lymphoblastic leukemia              | Blood         | 19   | 0.963      | 0.964          |
| 38 | CCRF-SB           | Childhood T acute lymphoblastic leukemia              | Blood         | 91   | 0.968      | 0.968          |
| 39 | CEM-0             | T-cell leukemia                                       | Blood         | 28   | 0.999      | 0.999          |
| 40 | CEM-SS            | Childhood T acute lymphoblastic leukemia              | Blood         | 124  | 0.984      | 0.984          |

|    |              |                                          |                                    |      |       |       |
|----|--------------|------------------------------------------|------------------------------------|------|-------|-------|
| 41 | CEM-c113     | Childhood T acute lymphoblastic leukemia | Blood                              | 4    | 1.000 | 1.000 |
| 42 | CEM/C2       | Camptothecin-resistant CEM               | Blood                              | 15   | 0.953 | 0.958 |
| 43 | CFPAC-1      | Pancreatic carcinoma                     | Pancreas                           | 38   | 0.809 | 0.787 |
| 44 | CH1          | Ovarian carcinoma                        | Ovary                              | 130  | 0.985 | 0.984 |
| 45 | COLO 205     | Colon adenocarcinoma                     | Colon                              | 1152 | 0.907 | 0.907 |
| 46 | COLO 320     | Colon adenocarcinoma                     | Colon                              | 6    | 0.988 | 0.980 |
| 47 | COLO 320DM   | Colon adenocarcinoma                     | Colon                              | 6    | 1.000 | 1.000 |
| 48 | CPT30        | Nasopharyngeal carcinoma                 | Head and neck                      | 7    | 1.000 | 1.000 |
| 49 | CWR22R       | Prostate carcinoma epithelial cell line  | Prostate                           | 123  | 0.863 | 0.849 |
| 50 | CAOV-3       | High grade ovarian serous adenocarcinoma | Ovary                              | 38   | 0.943 | 0.944 |
| 51 | Col2         | Colon carcinoma                          | Colon                              | 101  | 0.977 | 0.977 |
| 52 | D54          | Glioblastoma                             | Brain                              | 4    | 0.995 | 0.995 |
| 53 | DAN-G        | Human pancreas adenocarcinoma cell line  | Pancreas                           | 48   | 0.956 | 0.957 |
| 54 | DLD-1        | Colon adenocarcinoma                     | Colon                              | 499  | 0.950 | 0.949 |
| 55 | DMS-114      | Lung carcinoma                           | Lung                               | 103  | 0.800 | 0.789 |
| 56 | DO4          | Melanoma                                 | Skin                               | 6    | 0.998 | 0.998 |
| 57 | DU-145       | Prostate carcinoma                       | Prostate                           | 2797 | 0.896 | 0.895 |
| 58 | EKVX         | Non-small cell lung carcinoma            | Lung                               | 262  | 0.881 | 0.880 |
| 59 | FaDu         | Hypopharyngeal squamous carcinoma        | Upper aerodigestive tract          | 60   | 0.962 | 0.962 |
| 60 | G-361        | Melanoma                                 | Skin                               | 165  | 0.887 | 0.880 |
| 61 | GBM          | Glioblastoma multiforme                  | Brain                              | 11   | 0.999 | 0.999 |
| 62 | GC3/CI       | Colorectal carcinoma                     | Colon                              | 5    | 1.000 | 1.000 |
| 63 | GC3/M        | Colorectal carcinoma                     | Colon                              | 15   | 1.000 | 1.000 |
| 64 | GC3/MTK      | Colorectal carcinoma                     | Colon                              | 54   | 1.000 | 1.000 |
| 65 | GHOST CXCR4  | Osteosarcoma                             | Bone                               | 3    | 1.000 | 1.000 |
| 66 | GLC4         | Small cell lung carcinoma                | Lung                               | 10   | 0.999 | 0.999 |
| 67 | H2981        | Lung carcinoma                           | Lung                               | 11   | 0.984 | 0.985 |
| 68 | H322         | Lung carcinoma                           | Lung                               | 6    | 1.000 | 1.000 |
| 69 | H9           | T-lymphoid                               | Haematopoietic and lymphoid tissue | 117  | 0.872 | 0.867 |
| 70 | HA22T        | Hepatocellular carcinoma                 | Liver                              | 19   | 0.999 | 0.999 |
| 71 | HBL          | Melanoma                                 | Skin                               | 10   | 0.937 | 0.935 |
| 72 | HCC 2998     | Colon adenocarcinoma                     | Colon                              | 348  | 0.880 | 0.881 |
| 73 | HCT-116      | Colon carcinoma                          | Colon                              | 6502 | 0.888 | 0.887 |
| 74 | HCT-116/VM46 | Colon carcinoma                          | Colon                              | 78   | 1.000 | 1.000 |
| 75 | HCT-15       | Colon adenocarcinoma                     | Colon                              | 1322 | 0.897 | 0.895 |
| 76 | HCT-8        | Ileocecal adenocarcinoma                 | Large intestine                    | 564  | 0.962 | 0.961 |
| 77 | HeLa         | Cervical adenocarcinoma                  | Cervix                             | 4059 | 0.905 | 0.904 |
| 78 | HepG2        | Hepatoblastoma                           | Liver                              | 2032 | 0.915 | 0.915 |
| 79 | HEY          | Ovarian carcinoma                        | Ovary                              | 29   | 0.987 | 0.987 |
| 80 | HL-60        | Promyeloblast leukemia                   | Haematopoietic and lymphoid tissue | 3155 | 0.902 | 0.902 |
| 81 | HN5          | Squamous cell carcinoma                  | Skin                               | 73   | 0.989 | 0.989 |
| 82 | HNO 97       | Oral cavity squamous cell carcinoma      | Head and neck                      | 12   | 0.999 | 0.999 |
| 83 | HONE1        | Nasopharyngeal carcinoma                 | Head and neck                      | 30   | 0.999 | 0.999 |
| 84 | HOP-18       | Non-small cell lung carcinoma            | Lung                               | 9    | 0.913 | 0.915 |

|     |                           |                                                  |                                    |      |       |       |
|-----|---------------------------|--------------------------------------------------|------------------------------------|------|-------|-------|
| 85  | HOP-62                    | Non-small cell lung carcinoma                    | Lung                               | 867  | 0.894 | 0.893 |
| 86  | HOP-92                    | Non-small cell lung carcinoma                    | Lung                               | 413  | 0.843 | 0.836 |
| 87  | HOS                       | Osteosarcoma                                     | Bone                               | 137  | 0.870 | 0.869 |
| 88  | HOS-TE85                  | Osteosarcoma                                     | Bone                               | 13   | 0.859 | 0.860 |
| 89  | HPAC                      | Pancreatic adenocarcinoma                        | Pancreas                           | 21   | 0.979 | 0.979 |
| 90  | HRT-18                    | Colon adenocarcinoma                             | Colon                              | 4    | 1.000 | 1.000 |
| 91  | Hs 683                    | Oligodendroglioma                                | Brain                              | 4    | 0.879 | 0.883 |
| 92  | Hs 766                    | Pancreatic carcinoma                             | Pancreas                           | 9    | 1.000 | 1.000 |
| 93  | Hs-578T                   | Invasive ductal breast carcinoma                 | Breast                             | 152  | 0.876 | 0.876 |
| 94  | HT-1080                   | Fibrosarcoma                                     | Soft tissue                        | 338  | 0.903 | 0.899 |
| 95  | HT-29                     | Colon adenocarcinoma                             | Colon                              | 4681 | 0.887 | 0.886 |
| 96  | Huh-7                     | Hepatocellular carcinoma                         | Liver                              | 120  | 0.928 | 0.927 |
| 97  | HuP-T3                    | Pancreatic adenocarcinoma                        | Pancreas                           | 61   | 0.870 | 0.850 |
| 98  | HuT78                     | T-lymphoma                                       | Haematopoietic and lymphoid tissue | 28   | 0.971 | 0.972 |
| 99  | HuTu80                    | Duodenal adenocarcinoma                          | Small intestine                    | 8    | 1.000 | 1.000 |
| 100 | Human lung LXF 629L tumor | Lung adenocarcinoma                              | Lung                               | 7    | 0.981 | 0.981 |
| 101 | IGROV-1                   | Ovarian adenocarcinoma                           | Ovarium                            | 643  | 0.880 | 0.878 |
| 102 | IMR-32                    | Neuroblastoma                                    | Nervous system                     | 81   | 0.965 | 0.965 |
| 103 | Ishikawa                  | Endometrial adenocarcinoma                       | Uterus                             | 45   | 0.974 | 0.974 |
| 104 | J82                       | Bladder carcinoma                                | Urinary tract                      | 167  | 0.879 | 0.871 |
| 105 | JAM                       | Ovarian cystadenocarcinoma                       | Ovarium                            | 5    | 0.998 | 0.998 |
| 106 | Jurkat                    | Acute leukemic T-cells                           | Blood                              | 1244 | 0.933 | 0.933 |
| 107 | K562                      | Erythroleukemia                                  | Haematopoietic and lymphoid tissue | 3538 | 0.891 | 0.890 |
| 108 | KARPAS-299                | Anaplastic large cell lymphoma                   | Haematopoietic and lymphoid tissue | 110  | 0.867 | 0.868 |
| 109 | KATO III stomach cancer   | Signet ring cell gastric adenocarcinoma          | Stomach                            | 23   | 0.991 | 0.991 |
| 110 | Kasumi 1                  | Childhood acute myeloid leukemia with maturation | Haematopoietic and lymphoid tissue | 63   | 0.814 | 0.814 |
| 111 | KBM-3                     | Acute myelomonocytic leukemia                    | Blood                              | 3    | 1.000 | 1.000 |
| 112 | KBM-3/DOX                 | Acute myelomonocytic leukemia                    | Blood                              | 3    | 1.000 | 1.000 |
| 113 | KETR3                     | Renal carcinoma                                  | Kidney                             | 41   | 0.968 | 0.968 |
| 114 | KM12                      | Colon adenocarcinoma                             | Colon                              | 642  | 0.868 | 0.864 |
| 115 | KKLS                      | Gastric adenocarcinoma                           | Stomach                            | 4    | 0.999 | 0.999 |
| 116 | L2987                     | Lung adenocarcinoma                              | Lung                               | 11   | 0.972 | 0.972 |
| 117 | LAPC4                     | Prostate carcinoma                               | Prostate                           | 10   | 1.000 | 1.000 |
| 118 | LNCaP                     | Prostate carcinoma                               | Prostate                           | 918  | 0.952 | 0.953 |
| 119 | LoVo                      | Colon adenocarcinoma                             | Colon                              | 781  | 0.930 | 0.928 |
| 120 | LOX IMVI                  | Melanoma                                         | Skin                               | 636  | 0.898 | 0.898 |
| 121 | LS174T                    | Colon adencocarcinoma                            | Colon                              | 27   | 0.864 | 0.864 |
| 122 | Leukemia cells            | Leukemia                                         | Blood                              | 8    | 0.889 | 0.890 |
| 123 | Lu1                       | Lung carcinoma                                   | Lung                               | 57   | 0.954 | 0.953 |
| 124 | Lung cancer cell line     | Lung cancer                                      | Lung                               | 7    | 0.968 | 0.968 |
| 125 | LXFL 529                  | Non-small cell lung carcinoma                    | Lung                               | 14   | 0.963 | 0.965 |
| 126 | M14                       | Melanoma                                         | Skin                               | 662  | 0.883 | 0.882 |

|     |                |                                      |                                    |      |       |       |
|-----|----------------|--------------------------------------|------------------------------------|------|-------|-------|
| 127 | M19-MEL        | Melanoma                             | Skin                               | 9    | 0.956 | 0.957 |
| 128 | M21            | Melanoma                             | Skin                               | 187  | 0.983 | 0.983 |
| 129 | Malme-3M       | Melanoma                             | Skin                               | 403  | 0.875 | 0.875 |
| 130 | Manca          | Burkitt's line -high grade lymphoma  | Haematopoietic and lymphoid tissue | 8    | 1.000 | 1.000 |
| 131 | MAXF401        | Breast carcinoma                     | Breast                             | 7    | 0.918 | 0.919 |
| 132 | MCF7           | Breast carcinoma                     | Breast                             | 8126 | 0.866 | 0.865 |
| 133 | MCF7R          | Breast carcinoma                     | Breast                             | 69   | 0.996 | 0.996 |
| 134 | MCF7S          | Breast carcinoma                     | Breast                             | 38   | 0.971 | 0.947 |
| 135 | MDA-MB-231     | Breast adenocarcinoma                | Breast                             | 2999 | 0.891 | 0.890 |
| 136 | MDA-MB-361     | Breast adenocarcinoma                | Breast                             | 160  | 0.884 | 0.880 |
| 137 | MDA-MB-453     | Breast adenocarcinoma                | Breast                             | 70   | 0.802 | 0.810 |
| 138 | MDA-MB-468     | Breast adenocarcinoma                | Breast                             | 656  | 0.892 | 0.892 |
| 139 | MES-SA         | Uterine corpus sarcoma               | Uterus                             | 48   | 0.964 | 0.964 |
| 140 | MES-SA/DXS     | Uterine corpus sarcoma               | Uterus                             | 45   | 0.923 | 0.923 |
| 141 | MEXF276L       | Xenograft melanoma                   | Skin                               | 4    | 0.807 | 0.808 |
| 142 | MEXF989        | Xenograft melanoma                   | Skin                               | 4    | 0.807 | 0.808 |
| 143 | MIA PaCa-2     | Pancreatic carcinoma                 | Pancreas                           | 504  | 0.912 | 0.909 |
| 144 | MKN-45         | Gastric adenocarcinoma               | Stomach                            | 556  | 0.961 | 0.961 |
| 145 | MKN-7          | Gastric carcinoma                    | Stomach                            | 33   | 0.859 | 0.861 |
| 146 | MM96L          | Melanoma                             | Skin                               | 62   | 1.000 | 1.000 |
| 147 | MOH            | Human B lymphocyte. EBV transformed  | Blood                              | 5    | 1.000 | 1.000 |
| 148 | MOLT-3         | T-lymphoblastic leukemia             | Blood                              | 85   | 0.982 | 0.980 |
| 149 | MOLT-4         | Acute T-lymphoblastic leukemia       | Blood                              | 946  | 0.874 | 0.873 |
| 150 | MOVP-3         | Adult T acute lymphoblastic leukemia | Blood                              | 3    | 1.000 | 1.000 |
| 151 | MT4            | Adult T acute lymphoblastic leukemia | Blood                              | 405  | 0.980 | 0.980 |
| 152 | MV4-11         | Myeloid leukemia                     | Haematopoietic and lymphoid tissue | 356  | 0.972 | 0.973 |
| 153 | MX1            | Breast carcinoma                     | Breast                             | 215  | 0.978 | 0.978 |
| 154 | MeWo           | Melanoma                             | Skin                               | 8    | 0.879 | 0.879 |
| 155 | Melanoma cells | Melanoma                             | Skin                               | 5    | 0.912 | 0.913 |
| 156 | NALM-6         | Adult B acute lymphoblastic leukemia | Haematopoietic and lymphoid tissue | 111  | 0.812 | 0.801 |
| 157 | NB-4           | Acute promyelocytic leukemia         | Haematopoietic and lymphoid tissue | 135  | 0.983 | 0.983 |
| 158 | NCH82          | Glioblastoma                         | Brain                              | 6    | 1.000 | 1.000 |
| 159 | NCI-H128       | Small cell lung cancer               | Lung                               | 16   | 0.909 | 0.905 |
| 160 | NCI-H1299      | Non-small cell lung carcinoma        | Lung                               | 158  | 0.864 | 0.853 |
| 161 | NCI-H187       | Small cell lung carcinoma            | Lung                               | 74   | 0.820 | 0.800 |
| 162 | NCI-H1975      | Bronchoalveolar carcinoma            | Lung                               | 259  | 0.963 | 0.963 |
| 163 | NCI-H226       | Non-small cell lung carcinoma        | Lung                               | 493  | 0.864 | 0.860 |
| 164 | NCI-H23        | Non-small cell lung carcinoma        | Lung                               | 690  | 0.862 | 0.862 |
| 165 | NCI-H295R      | Adrenal cortex carcinoma             | Adrenal cortex                     | 11   | 0.844 | 0.846 |
| 166 | NCI-H322M      | Non-small cell lung carcinoma        | Lung                               | 348  | 0.852 | 0.852 |
| 167 | NCI-H417       | Small cell lung carcinoma            | Lung                               | 21   | 0.980 | 0.981 |
| 168 | NCI-H46        | Lung carcinoma                       | Lung                               | 6    | 1.000 | 1.000 |
| 169 | NCI-H460       | Non-small cell lung carcinoma        | Lung                               | 2457 | 0.901 | 0.899 |

|     |                         |                                                          |                                    |      |       |       |
|-----|-------------------------|----------------------------------------------------------|------------------------------------|------|-------|-------|
| 170 | NCI-H522                | Non-small cell lung carcinoma                            | Lung                               | 614  | 0.863 | 0.858 |
| 171 | NCI-H647                | Adenosquamous lung carcinoma                             | Lung                               | 10   | 0.887 | 0.887 |
| 172 | NCI-H69                 | Small cell lung carcinoma                                | Lung                               | 189  | 0.894 | 0.894 |
| 173 | NCI-H838                | Non-small cell lung cancer. 3 stage                      | Lung                               | 19   | 0.804 | 0.729 |
| 174 | NCI-N87                 | gastric carcinoma                                        | Stomach                            | 228  | 0.919 | 0.920 |
| 175 | NSCLC                   | Non-small cell lung carcinoma                            | Lung                               | 64   | 0.927 | 0.928 |
| 176 | NT2                     | Embryonal carcinoma                                      | Germ cell. fibroblast              | 58   | 0.993 | 0.992 |
| 177 | NUGC                    | Gastric carcinoma                                        | Stomach                            | 6    | 1.000 | 1.000 |
| 178 | NUGC-3                  | Gastric carcinoma                                        | Stomach                            | 228  | 0.913 | 0.913 |
| 179 | OVCAR                   | Ovarian adenocarcinoma                                   | Ovarium                            | 72   | 0.975 | 0.975 |
| 180 | OVCAR-3                 | Ovarian adenocarcinoma                                   | Ovarium                            | 1197 | 0.901 | 0.901 |
| 181 | OVCAR-4                 | Ovarian adenocarcinoma                                   | Ovarium                            | 438  | 0.830 | 0.829 |
| 182 | OVCAR-5                 | Ovarian adenocarcinoma                                   | Ovarium                            | 375  | 0.838 | 0.834 |
| 183 | OVCAR-8                 | Ovarian adenocarcinoma                                   | Ovarium                            | 547  | 0.871 | 0.867 |
| 184 | OVXF1023                | Ovarian adenocarcinoma                                   | Ovarium                            | 3    | 1.000 | 1.000 |
| 185 | OVXF1353                | Ovarian adenocarcinoma                                   | Ovarium                            | 3    | 1.000 | 1.000 |
| 186 | Ovarian carcinoma cells | Ovarian adenocarcinoma                                   | Ovarium                            | 3    | 0.908 | 0.910 |
| 187 | PA-1                    | Ovarian carcinoma                                        | Ovarium                            | 135  | 0.841 | 0.836 |
| 188 | PANC-1                  | Pancreatic carcinoma                                     | Pancreas                           | 281  | 0.919 | 0.920 |
| 189 | PAXF546                 | Pancreatic carcinoma                                     | Pancreas                           | 4    | 0.807 | 0.808 |
| 190 | Panc203                 | Pancreatic carcinoma                                     | Pancreas                           | 6    | 1.000 | 1.000 |
| 191 | Panc430                 | Pancreatic carcinoma                                     | Pancreas                           | 8    | 1.000 | 1.000 |
| 192 | PC-3                    | Prostate carcinoma                                       | Prostate                           | 3410 | 0.891 | 0.891 |
| 193 | PC-6                    | Small cell lung carcinoma                                | Lung                               | 5    | 0.939 | 0.940 |
| 194 | PC-9                    | Lung adenocarcinoma                                      | Lung                               | 10   | 0.891 | 0.898 |
| 195 | PT-45                   | Pancreatic carcinoma                                     | Pancreas                           | 20   | 0.933 | 0.933 |
| 196 | QG-56                   | Squamous cell lung carcinoma                             | Lung                               | 90   | 1.000 | 1.000 |
| 197 | R2                      | Prostate Carcinoma                                       | Prostate                           | 13   | 0.996 | 0.996 |
| 198 | Raji                    | B-lymphoblastic                                          | Haematopoietic and lymphoid tissue | 155  | 0.894 | 0.896 |
| 199 | Ramos                   | Burkitts lymphoma B-cells                                | Blood                              | 41   | 0.907 | 0.903 |
| 200 | RKO                     | Colon carcinoma                                          | Colon                              | 177  | 0.835 | 0.833 |
| 201 | RPMI 8402               | Pre-T-lymphoblastoid cells. acute lymphoblastic leukemia | Haematopoietic and lymphoid tissue | 89   | 0.995 | 0.995 |
| 202 | RPMI-8226               | Multiple myeloma                                         | Haematopoietic and lymphoid tissue | 550  | 0.858 | 0.857 |
| 203 | RT-4                    | Bladder carcinoma                                        | Urinary tract                      | 40   | 0.938 | 0.939 |
| 204 | RWLeu4                  | Chronic myelogenous leukemia                             | Blood                              | 9    | 1.000 | 1.000 |
| 205 | RXF 393                 | Renal carcinoma                                          | Kidney                             | 429  | 0.884 | 0.881 |
| 206 | RXF 423                 | Renal carcinoma                                          | Kidney                             | 3    | 1.000 | 1.000 |
| 207 | RXF 944                 | Renal carcinoma                                          | Kidney                             | 8    | 0.985 | 0.985 |
| 208 | S1B1-20                 | Colon carcinoma                                          | Colon                              | 38   | 1.000 | 1.000 |
| 209 | SAOS-2                  | Osteosarcoma                                             | Bone                               | 44   | 0.933 | 0.932 |
| 210 | SF-268                  | Glioblastoma                                             | Brain                              | 795  | 0.876 | 0.870 |
| 211 | SF-295                  | Glioblastoma                                             | Brain                              | 629  | 0.890 | 0.887 |
| 212 | SF-539                  | Glioblastoma                                             | Brain                              | 715  | 0.906 | 0.904 |

|     |           |                                                       |                                    |      |       |       |
|-----|-----------|-------------------------------------------------------|------------------------------------|------|-------|-------|
| 213 | SGC-7901  | Gastric carcinoma                                     | Stomach                            | 214  | 0.962 | 0.961 |
| 214 | SH-SY5Y   | Bone marrow neuroblastoma                             | Brain                              | 197  | 0.931 | 0.932 |
| 215 | SiHa      | Cervical squamous cell carcinoma                      | Cervix                             | 338  | 0.951 | 0.949 |
| 216 | SHP77     | Small cell lung carcinoma                             | Lung                               | 9    | 0.909 | 0.911 |
| 217 | SISO      | Uterine cervical adenocarcinoma                       | Cervix                             | 28   | 0.949 | 0.949 |
| 218 | SJSA-1    | Osteosarcoma                                          | Bone                               | 121  | 0.856 | 0.849 |
| 219 | SK-BR-3   | Breast adenocarcinoma                                 | Breast                             | 1143 | 0.954 | 0.954 |
| 220 | SK-ES1    | Ewing sarcoma                                         | Bone                               | 5    | 0.809 | 0.809 |
| 221 | SK-HEP1   | Hepatocellular carcinoma                              | Liver                              | 101  | 0.982 | 0.982 |
| 222 | SK-MEL    | Melanoma                                              | Skin                               | 47   | 0.966 | 0.966 |
| 223 | SK-MEL-1  | Metastatic melanoma                                   | Skin                               | 58   | 0.803 | 0.809 |
| 224 | SK-MEL-2  | Melanoma                                              | Skin                               | 640  | 0.871 | 0.865 |
| 225 | SK-MEL-28 | Melanoma                                              | Skin                               | 786  | 0.881 | 0.877 |
| 226 | SK-MEL-5  | Melanoma                                              | Skin                               | 665  | 0.898 | 0.898 |
| 227 | SK-MES-1  | Squamous cell lung carcinoma                          | Lung                               | 126  | 0.842 | 0.830 |
| 228 | SK-N-SH   | Neuroblastoma                                         | Nervous system                     | 105  | 0.924 | 0.925 |
| 229 | SK-OV-3   | Ovarian carcinoma                                     | Ovarium                            | 1539 | 0.895 | 0.893 |
| 230 | Skut1B    | Uterine corpus leiomyosarcoma                         | Ovarium                            | 4    | 1.000 | 1.000 |
| 231 | SK-VLB    | Ovarian carcinoma                                     | Ovarium                            | 17   | 0.930 | 0.931 |
| 232 | SMMC-7721 | Hepatocellular carcinoma                              | Liver                              | 282  | 0.948 | 0.942 |
| 233 | SN12C     | Renal carcinoma                                       | Kidney                             | 782  | 0.883 | 0.879 |
| 234 | SNB-7     | Glioblastoma                                          | Brain                              | 4    | 0.998 | 0.998 |
| 235 | SNB-75    | Glioblastoma                                          | Nervous system                     | 413  | 0.872 | 0.872 |
| 236 | SNU-398   | Hepatocellular carcinoma                              | Liver                              | 73   | 0.966 | 0.963 |
| 237 | SNU-638   | Gastric carcinoma                                     | Stomach                            | 94   | 0.956 | 0.955 |
| 238 | SPC-A4    | Lung Adenocarcinoma                                   | Lung                               | 10   | 1.000 | 1.000 |
| 239 | SQ20B     | Head and neck Squamous carcinoma                      | Head and neck                      | 33   | 0.957 | 0.957 |
| 240 | SR        | Adult immunoblastic lymphoma                          | Haematopoietic and lymphoid tissue | 578  | 0.864 | 0.859 |
| 241 | St-4      | Stomach carcinoma                                     | Stomach                            | 30   | 0.888 | 0.889 |
| 242 | ST-KM-1   | Gastric carcinoma                                     | Stomach                            | 3    | 1.000 | 1.000 |
| 243 | SW1353    | Bone chondrosarcoma                                   | Bone                               | 40   | 0.956 | 0.957 |
| 244 | SW1573    | Lung carcinoma                                        | Lung                               | 160  | 0.901 | 0.891 |
| 245 | SW-1736   | Thyroid gland undifferentiated (anaplastic) carcinoma | Thyroid                            | 50   | 0.995 | 0.995 |
| 246 | SW480     | Colon adenocarcinoma                                  | Colon                              | 524  | 0.951 | 0.950 |
| 247 | SW-60     | Colorectal carcinoma                                  | Colon                              | 3    | 1.000 | 1.000 |
| 248 | SW-620    | Colon adenocarcinoma                                  | Colon                              | 1223 | 0.906 | 0.906 |
| 249 | T-24      | Bladder carcinoma                                     | Urinary tract                      | 187  | 0.912 | 0.905 |
| 250 | T47D      | Breast carcinoma                                      | Breast                             | 991  | 0.885 | 0.886 |
| 251 | T98G      | Glioblastoma                                          | Brain                              | 129  | 0.843 | 0.836 |
| 252 | TCC-SUP   | Bladder Carcinoma                                     | Urinary tract                      | 11   | 0.941 | 0.941 |
| 253 | TF-1      | Bone marrow erythroleukemic                           | Haematopoietic and lymphoid tissue | 28   | 0.987 | 0.969 |
| 254 | THP-1     | Acute monocytic leukemia                              | Blood                              | 1105 | 0.962 | 0.962 |
| 255 | TK-10     | Renal carcinoma                                       | Kidney                             | 328  | 0.866 | 0.867 |
| 256 | TSGH      | Glioma                                                | Brain                              | 40   | 0.988 | 0.988 |

|             |           |                                        |                                    |     |              |              |
|-------------|-----------|----------------------------------------|------------------------------------|-----|--------------|--------------|
| 257         | TSGH 9201 | Gastric carcinoma                      | Stomach                            | 18  | 1.000        | 1.000        |
| 258         | TSU       | Prostatic carcinoma                    | Prostate                           | 15  | 0.946        | 0.946        |
| 259         | U-251     | Glioma                                 | Brain                              | 694 | 0.875        | 0.873        |
| 260         | U-266     | Plasma cell myeloma                    | Blood                              | 108 | 0.851        | 0.840        |
| 261         | U2OS      | Osteosarcoma                           | Bone                               | 80  | 0.930        | 0.930        |
| 262         | U373 MG   | Glioblastoma                           | Brain                              | 154 | 0.980        | 0.980        |
| 263         | U-87 MG   | Lymphoblastic lymphoma                 | Blood                              | 157 | 0.968        | 0.968        |
| 264         | U-937     | Histiocytic lymphoma                   | Haematopoietic and lymphoid tissue | 519 | 0.946        | 0.946        |
| 265         | U-937/GTB | Histiocytic lymphoma                   | Blood                              | 10  | 0.833        | 0.834        |
| 266         | UACC-257  | Melanoma                               | Skin                               | 348 | 0.835        | 0.835        |
| 267         | UACC-375  | Melanoma                               | Skin                               | 86  | 0.993        | 0.993        |
| 268         | UACC-62   | Melanoma                               | Skin                               | 873 | 0.900        | 0.901        |
| 269         | UACC-903  | Malignant melanoma                     | Skin                               | 20  | 0.999        | 0.999        |
| 270         | UCLA P-3  | Lung carcinoma cell line               | Lung                               | 5   | 1.000        | 1.000        |
| 271         | UMSCC22B  | Hypopharyngeal squamous cell carcinoma | Upper aerodigestive tract          | 4   | 0.999        | 0.621        |
| 272         | UMUC3     | Bladder Carcinoma                      | Urinary tract                      | 21  | 0.956        | 0.956        |
| 273         | UO-31     | Renal carcinoma                        | Kidney                             | 431 | 0.852        | 0.847        |
| 274         | UT7       | Leukaemia                              | Blood                              | 11  | 1.000        | 1.000        |
| 275         | WiDr-NTR  | Colon Adenocarcinoma                   | Colon                              | 8   | 1.000        | 1.000        |
| 276         | XF498     | Glioma                                 | Brain                              | 98  | 0.959        | 0.959        |
| 277         | YAPC      | Pancreatic carcinoma                   | Pancreas                           | 49  | 0.805        | 0.813        |
| 278         | ZR-75-1   | Breast carcinoma                       | Breast                             | 204 | 0.964        | 0.964        |
| <b>Mean</b> |           |                                        |                                    |     | <b>0.915</b> | <b>0.913</b> |

N – number of active compounds in the training set.
