# Supplementary material for: CLC-Pred: A freely available web-service for in silico prediction of human cell line cytotoxicity for drug-like compounds
Source: PubMed Central journal article supplement (PMC5784992; doi:10.1371/journal.pone.0191838), 2018-01-25
Supplement: pone.0191838.s003.pdf [file pone.0191838.s003.pdf]

**S2 Table.**

| Pa                                    | Pi    | Cell-line                    | Cell-line name                        | Tissue/organ                       |
|---------------------------------------|-------|------------------------------|---------------------------------------|------------------------------------|
| <i>doxorubicin, cancer cell lines</i> |       |                              |                                       |                                    |
| 0.908                                 | 0.001 | MES-SA                       | Uterine corpus sarcoma                | Uterus                             |
| 0.760                                 | 0.004 | NCI-H838                     | Non-small cell lung cancer. 3 stage   | Lung                               |
| 0.718                                 | 0.002 | RXF 944                      | Renal carcinoma                       | Kidney                             |
| 0.680                                 | 0.001 | MAXF401                      | Breast carcinoma                      | Breast                             |
| 0.661                                 | 0.005 | DMS-114                      | Lung carcinoma                        | Lung                               |
| 0.653                                 | 0.000 | UCLA P-3                     | Lung carcinoma cell line              | Lung                               |
| 0.629                                 | 0.000 | KBM-3                        | Acute myelomonocytic leukemia         | Blood                              |
| 0.629                                 | 0.000 | KBM-3/DOX                    | Acute myelomonocytic leukemia         | Blood                              |
| 0.609                                 | 0.004 | NCI-H187                     | Small cell lung carcinoma             | Lung                               |
| 0.620                                 | 0.029 | MCF7                         | Breast carcinoma                      | Breast                             |
| 0.595                                 | 0.011 | SF-268                       | Glioblastoma                          | Brain                              |
| 0.586                                 | 0.004 | A2058                        | Melanoma                              | Skin                               |
| 0.580                                 | 0.001 | LXFL 529                     | Non-small cell lung carcinoma         | Lung                               |
| 0.569                                 | 0.000 | SK-ES1                       | Ewing sarcoma                         | Bone                               |
| 0.580                                 | 0.015 | HepG2                        | Hepatoblastoma                        | Liver                              |
| 0.564                                 | 0.004 | MDA-MB-453                   | Breast adenocarcinoma                 | Breast                             |
| 0.549                                 | 0.000 | SHP77                        | Small cell lung carcinoma             | Lung                               |
| 0.551                                 | 0.004 | SK-MES-1                     | Squamous cell lung carcinoma          | Lung                               |
| 0.558                                 | 0.017 | UACC-257                     | Melanoma                              | Skin                               |
| 0.529                                 | 0.003 | MES-SA/DXS                   | Uterine corpus sarcoma                | Uterus                             |
| 0.523                                 | 0.004 | YAPC                         | Pancreatic carcinoma                  | Pancreas                           |
| 0.532                                 | 0.018 | NCI-H322M                    | Non-small cell lung carcinoma         | Lung                               |
| 0.528                                 | 0.016 | TK-10                        | Renal carcinoma                       | Kidney                             |
| 0.526                                 | 0.019 | OVCAR-5                      | Ovarian adenocarcinoma                | Ovary                              |
| 0.508                                 | 0.008 | U-266                        | Plasma cell myeloma                   | Blood                              |
| 0.512                                 | 0.019 | A498                         | Renal carcinoma                       | Kidney                             |
| 0.493                                 | 0.001 | L2987                        | Lung adenocarcinoma                   | Lung                               |
| 0.496                                 | 0.017 | SK-MEL-28                    | Melanoma                              | Skin                               |
| 0.491                                 | 0.013 | RPMI-8226                    | Multiple myeloma                      | Haematopoietic and lymphoid tissue |
| 0.480                                 | 0.006 | HOS                          | Osteosarcoma                          | Bone                               |
| 0.498                                 | 0.027 | HL-60                        | Promyeloblast leukemia                | Haematopoietic and lymphoid tissue |
| 0.487                                 | 0.023 | OVCAR-4                      | Ovarian adenocarcinoma                | Ovary                              |
| 0.462                                 | 0.011 | RKO                          | Colon carcinoma                       | Colon                              |
| 0.451                                 | 0.004 | A2780cisR                    | Cisplatin-resistant ovarian carcinoma | Ovary                              |
| 0.447                                 | 0.007 | NALM-6                       | Adult B acute lymphoblastic leukemia  | Haematopoietic and lymphoid tissue |
| 0.445                                 | 0.005 | T-24                         | Bladder carcinoma                     | Urinary tract                      |
| 0.445                                 | 0.006 | Caco-2                       | Colon adenocarcinoma                  | Colon                              |
| 0.434                                 | 0.001 | Human lung<br>LXF 629L tumor | Lung adenocarcinoma                   | Lung                               |
| 0.453                                 | 0.024 | HOP-92                       | Non-small cell lung carcinoma         | Lung                               |
| 0.443                                 | 0.022 | BT-549                       | Breast ductal carcinoma               | Breast                             |
| 0.426                                 | 0.005 | SJSA-1                       | Osteosarcoma                          | Bone                               |
| 0.427                                 | 0.012 | PA-1                         | Ovarian carcinoma                     | Ovary                              |
| 0.440                                 | 0.025 | SNB-75                       | Glioblastoma                          | Nervous system                     |
| 0.435                                 | 0.028 | Malme-3M                     | Melanoma                              | Skin                               |
| 0.413                                 | 0.007 | HuP-T3                       | Pancreatic adenocarcinoma             | Pancreas                           |
| 0.430                                 | 0.031 | OVCAR-8                      | Ovarian adenocarcinoma                | Ovary                              |
| 0.432                                 | 0.033 | NCI-H226                     | Non-small cell lung carcinoma         | Lung                               |
| 0.404                                 | 0.009 | T98G                         | Glioblastoma                          | Brain                              |
| 0.419                                 | 0.030 | UO-31                        | Renal carcinoma                       | Kidney                             |
| 0.390                                 | 0.002 | U-937/GTB                    | Histiocytic lymphoma                  | Blood                              |
| 0.372                                 | 0.002 | HOS-TE85                     | Osteosarcoma                          | Bone                               |
| 0.369                                 | 0.004 | MDA-MB-361                   | Breast adenocarcinoma                 | Breast                             |
| 0.397                                 | 0.037 | SK-MEL-2                     | Melanoma                              | Skin                               |

|       |       |            |                                                       |                                    |
|-------|-------|------------|-------------------------------------------------------|------------------------------------|
| 0.364 | 0.008 | CWR22R     | Prostate carcinoma epithelial cell line               | Prostate                           |
| 0.380 | 0.025 | RXF 393    | Renal carcinoma                                       | Kidney                             |
| 0.363 | 0.011 | Raji       | B-lymphoblastic cells                                 | Haematopoietic and lymphoid tissue |
| 0.398 | 0.046 | MOLT-4     | Acute T-lymphoblastic leukemia                        | Blood                              |
| 0.357 | 0.008 | C8166      | Leukemic T-cells                                      | Blood                              |
| 0.363 | 0.015 | AGS        | Gastric adenocarcinoma                                | Stomach                            |
| 0.353 | 0.006 | G-361      | Melanoma                                              | Skin                               |
| 0.382 | 0.035 | OVCAR-3    | Ovarian adenocarcinoma                                | Ovary                              |
| 0.380 | 0.043 | SN12C      | Renal carcinoma                                       | Kidney                             |
| 0.418 | 0.083 | SK-MEL-1   | Metastatic melanoma                                   | Skin                               |
| 0.346 | 0.013 | 5637       | Urothelial bladder carcinoma                          | Urinary tract                      |
| 0.380 | 0.046 | DU-145     | Prostate carcinoma                                    | Prostate                           |
| 0.333 | 0.009 | NCI-H69    | Small cell lung carcinoma                             | Lung                               |
| 0.351 | 0.027 | 8505C      | Thyroid gland undifferentiated (anaplastic) carcinoma | Thyroid                            |
| 0.365 | 0.041 | SR         | Adult immunoblastic lymphoma                          | Haematopoietic and lymphoid tissue |
| 0.360 | 0.037 | SF-539     | Glioblastoma                                          | Brain                              |
| 0.331 | 0.009 | KARPAS-299 | Anaplastic large cell lymphoma                        | Haematopoietic and lymphoid tissue |
| 0.321 | 0.000 | H2981      | Lung carcinoma                                        | Lung                               |
| 0.318 | 0.004 | SK-MEL     | Melanoma                                              | Skin                               |
| 0.369 | 0.057 | K562       | Erythroleukemia                                       | Haematopoietic and lymphoid tissue |
| 0.324 | 0.017 | HT-1080    | Fibrosarcoma                                          | Soft tissue                        |
| 0.307 | 0.010 | BXPC-3     | Pancreatic adenocarcinoma                             | Pancreas                           |
| 0.351 | 0.056 | CAKI-1     | Kidney carcinoma                                      | Kidney                             |
| 0.339 | 0.052 | NCI-H522   | Non-small cell lung carcinoma                         | Lung                               |
| 0.305 | 0.018 | A-427      | Lung carcinoma                                        | Lung                               |
| 0.313 | 0.026 | NCI-H1299  | Non-small cell lung carcinoma                         | Lung                               |
| 0.322 | 0.045 | UACC-62    | Melanoma                                              | Skin                               |
| 0.309 | 0.032 | PANC-1     | Pancreatic carcinoma                                  | Pancreas                           |
| 0.283 | 0.007 | SW1573     | Lung carcinoma                                        | Lung                               |
| 0.313 | 0.047 | SF-295     | Glioblastoma                                          | Brain                              |
| 0.341 | 0.076 | NCI-H23    | Non-small cell lung carcinoma                         | Lung                               |
| 0.281 | 0.017 | BGC-823    | Stomach adenocarcinoma                                | Stomach                            |
| 0.319 | 0.057 | IGROV-1    | Ovarian adenocarcinoma                                | Ovary                              |
| 0.325 | 0.073 | SK-OV-3    | Ovarian carcinoma                                     | Ovary                              |
| 0.254 | 0.003 | SK-HEP1    | Hepatocellular carcinoma                              | Liver                              |
| 0.317 | 0.070 | KM12       | Colon adenocarcinoma                                  | Colon                              |
| 0.258 | 0.013 | SH-SY5Y    | Bone marrow neuroblastoma                             | Brain                              |
| 0.259 | 0.015 | J82        | Bladder carcinoma                                     | Urinary tract                      |
| 0.247 | 0.007 | U2OS       | Osteosarcoma                                          | Bone                               |
| 0.237 | 0.001 | UMUC3      | Bladder Carcinoma                                     | Urinary tract                      |
| 0.292 | 0.063 | HOP-62     | Non-small cell lung carcinoma                         | Lung                               |
| 0.294 | 0.065 | ACHN       | Papillary renal carcinoma                             | Kidney                             |
| 0.230 | 0.009 | CAOV-3     | High grade ovarian serous adenocarcinoma              | Ovary                              |
| 0.291 | 0.070 | U-251      | Glioma                                                | Brain                              |
| 0.265 | 0.048 | Bel-7402   | Hepatoma                                              | Liver                              |
| 0.221 | 0.005 | IMR-32     | Neuroblastoma                                         | Nervous system                     |
| 0.220 | 0.005 | SNU-638    | Gastric carcinoma                                     | Stomach                            |
| 0.280 | 0.067 | SK-MEL-5   | Melanoma                                              | Skin                               |
| 0.213 | 0.004 | MOLT-3     | T-lymphoblastic leukemia                              | Blood                              |
| 0.203 | 0.003 | NCI-H417   | Small cell lung carcinoma                             | Lung                               |
| 0.194 | 0.003 | Bcap37     | Breast adenocarcinoma                                 | Breast                             |
| 0.195 | 0.006 | SK-VLB     | Ovarian carcinoma                                     | Ovary                              |
| 0.217 | 0.031 | U-937      | Histiocytic lymphoma                                  | Haematopoietic and lymphoid tissue |
| 0.249 | 0.064 | LOX IMVI   | Melanoma                                              | Skin                               |
| 0.188 | 0.007 | SK-N-SH    | Neuroblastoma                                         | Nervous system                     |
| 0.187 | 0.007 | SNU-398    | Hepatocellular carcinoma                              | Liver                              |
| 0.208 | 0.034 | NUGC-3     | Gastric carcinoma                                     | Stomach                            |
| 0.255 | 0.084 | MDA-MB-468 | Breast adenocarcinoma                                 | Breast                             |

|                                              |       |             |                                          |                                 |
|----------------------------------------------|-------|-------------|------------------------------------------|---------------------------------|
| 0.215                                        | 0.046 | Jurkat      | Acute leukemic T-cells                   | Blood                           |
| 0.251                                        | 0.083 | CCRF-CEM    | Childhood T acute lymphoblastic leukemia | Blood                           |
| 0.198                                        | 0.031 | NCI-N87     | gastric carcinoma                        | Stomach                         |
| 0.165                                        | 0.004 | Col2        | Colon carcinoma                          | Colon                           |
| 0.191                                        | 0.031 | SMMC-7721   | Hepatocellular carcinoma                 | Liver                           |
| 0.204                                        | 0.044 | A-375       | Malignant melanoma                       | Skin                            |
| 0.175                                        | 0.017 | SGC-7901    | Gastric carcinoma                        | Stomach                         |
| 0.252                                        | 0.095 | M14         | Melanoma                                 | Skin                            |
| 0.166                                        | 0.009 | ASPC1       | Pancreatic ductal adenocarcinoma         | Pancreas                        |
| 0.201                                        | 0.045 | DLD-1       | Colon adenocarcinoma                     | Colon                           |
| 0.223                                        | 0.070 | MIA PaCa-2  | Pancreatic carcinoma                     | Pancreas                        |
| 0.161                                        | 0.009 | XF498       | Glioma                                   | Brain                           |
| 0.239                                        | 0.100 | NCI-H460    | Non-small cell lung carcinoma            | Lung                            |
| 0.150                                        | 0.013 | NSCLC       | Non-small cell lung carcinoma            | Lung                            |
| 0.128                                        | 0.004 | CCRF-SB     | Childhood T acute lymphoblastic leukemia | Blood                           |
| 0.136                                        | 0.016 | CH1         | Ovarian carcinoma                        | Ovary                           |
| 0.134                                        | 0.024 | ZR-75-1     | Breast carcinoma                         | Breast                          |
| 0.239                                        | 0.130 | 786-0       | Renal carcinoma                          | Kidney                          |
| 0.111                                        | 0.008 | U373 MG     | Glioblastoma                             | Brain                           |
| 0.157                                        | 0.078 | ADR5000     | Childhood T acute lymphoblastic leukemia | Blood                           |
| 0.081                                        | 0.009 | OVCAR       | Ovarian adenocarcinoma                   | Ovary                           |
| 0.084                                        | 0.013 | U-87 MG     | Lymphoblastic lymphoma                   | Blood                           |
| 0.114                                        | 0.045 | HCT-8       | Ileocecal adenocarcinoma                 | Large intestine                 |
| 0.207                                        | 0.150 | T47D        | Breast carcinoma                         | Breast                          |
| 0.201                                        | 0.161 | MDA-MB-231  | Breast adenocarcinoma                    | Breast                          |
| 0.277                                        | 0.242 | CFPAC-1     | Pancreatic carcinoma                     | Pancreas                        |
| 0.102                                        | 0.073 | SW480       | Colon adenocarcinoma                     | Colon                           |
| 0.117                                        | 0.090 | LNCaP       | Prostate carcinoma                       | Prostate                        |
| 0.135                                        | 0.110 | A2780       | Ovarian carcinoma                        | Ovary                           |
| 0.092                                        | 0.070 | SiHa        | Cervical squamous cell carcinoma         | Cervix                          |
| 0.078                                        | 0.061 | KETR3       | Renal carcinoma                          | Kidney                          |
| 0.178                                        | 0.168 | HCT-15      | Colon adenocarcinoma                     | Colon                           |
| 0.020                                        | 0.018 | UACC-375    | Melanoma                                 | Skin                            |
| <b><i>doxorubicin, normal cell lines</i></b> |       |             |                                          |                                 |
| 0.960                                        | 0.002 | WI-38 VA13  | Embryonic lung fibroblast                | Lung                            |
| 0.822                                        | 0.000 | HEL 299     | Fibroblast                               | Lung                            |
| 0.804                                        | 0.002 | HMEC        | Microvascular endothelial cell           | Breast                          |
| 0.625                                        | 0.008 | MRC5        | Embryonic lung fibroblast                | Lung                            |
| 0.558                                        | 0.004 | BJ          | Foreskin fibroblast                      | Foreskin                        |
| 0.547                                        | 0.001 | NHDF        | Fibroblast                               | Skin                            |
| 0.532                                        | 0.000 | IMR-90      | Embryonic lung fibroblast                | Lung                            |
| 0.402                                        | 0.001 | CRL-7065    | Fibroblast                               | Skin                            |
| 0.373                                        | 0.002 | WIL2-NS     | Lymphoblastoid cell                      | Haematopoietic, lymphoid tissue |
| 0.249                                        | 0.003 | Detroit 551 | Embryonic skin                           | Skin                            |
| 0.205                                        | 0.009 | HaCaT       | Keratinocyte                             | Skin                            |
| 0.259                                        | 0.075 | HEK293      | Embryonic kidney fibroblast              | Kidney                          |
| 0.098                                        | 0.090 | WI-38       | Embryonic lung fibroblast                | Lung                            |
| <b><i>gemcitabine, cancer cell lines</i></b> |       |             |                                          |                                 |
| 0.821                                        | 0.003 | NCI-H838    | Non-small cell lung cancer. 3 stage      | Lung                            |
| 0.818                                        | 0.001 | HPAC        | Pancreatic adenocarcinoma                | Pancreas                        |
| 0.804                                        | 0.001 | CFPAC-1     | Pancreatic carcinoma                     | Pancreas                        |
| 0.764                                        | 0.006 | OVCAR-5     | Ovarian adenocarcinoma                   | Ovary                           |
| 0.757                                        | 0.005 | BT-549      | Breast ductal carcinoma                  | Breast                          |
| 0.750                                        | 0.007 | HOP-92      | Non-small cell lung carcinoma            | Lung                            |
| 0.733                                        | 0.002 | PC-9        | Lung adenocarcinoma                      | Lung                            |
| 0.730                                        | 0.003 | Caco-2      | Colon adenocarcinoma                     | Colon                           |
| 0.720                                        | 0.003 | A2058       | Melanoma                                 | Skin                            |
| 0.716                                        | 0.001 | COLO 320    | Colon adenocarcinoma                     | Colon                           |

|       |       |            |                                                       |                                    |
|-------|-------|------------|-------------------------------------------------------|------------------------------------|
| 0.689 | 0.006 | UACC-257   | Melanoma                                              | Skin                               |
| 0.687 | 0.006 | HeLa       | Cervical adenocarcinoma                               | Cervix                             |
| 0.674 | 0.009 | OVCAR-4    | Ovarian adenocarcinoma                                | Ovary                              |
| 0.669 | 0.005 | NCI-H23    | Non-small cell lung carcinoma                         | Lung                               |
| 0.666 | 0.009 | NCI-H226   | Non-small cell lung carcinoma                         | Lung                               |
| 0.647 | 0.008 | UO-31      | Renal carcinoma                                       | Kidney                             |
| 0.611 | 0.004 | NCI-H187   | Small cell lung carcinoma                             | Lung                               |
| 0.609 | 0.010 | SF-268     | Glioblastoma                                          | Brain                              |
| 0.611 | 0.012 | 786-0      | Renal carcinoma                                       | Kidney                             |
| 0.601 | 0.010 | OVCAR-8    | Ovarian adenocarcinoma                                | Ovary                              |
| 0.594 | 0.009 | CCRF-CEM   | Childhood T acute lymphoblastic leukemia              | Blood                              |
| 0.575 | 0.004 | T-24       | Bladder carcinoma                                     | Urinary tract                      |
| 0.573 | 0.003 | HuP-T3     | Pancreatic adenocarcinoma                             | Pancreas                           |
| 0.577 | 0.013 | Kasumi 1   | Childhood acute myeloid leukemia with maturation      | Haematopoietic and lymphoid tissue |
| 0.566 | 0.004 | PA-1       | Ovarian carcinoma                                     | Ovary                              |
| 0.565 | 0.004 | HOS        | Osteosarcoma                                          | Bone                               |
| 0.567 | 0.012 | EKVX       | Non-small cell lung carcinoma                         | Lung                               |
| 0.555 | 0.005 | U-266      | Plasma cell myeloma                                   | Blood                              |
| 0.551 | 0.004 | SK-MES-1   | Squamous cell lung carcinoma                          | Lung                               |
| 0.565 | 0.017 | MOLT-4     | Acute T-lymphoblastic leukemia                        | Blood                              |
| 0.553 | 0.014 | SK-MEL-2   | Melanoma                                              | Skin                               |
| 0.541 | 0.005 | RKO        | Colon carcinoma                                       | Colon                              |
| 0.548 | 0.015 | TK-10      | Renal carcinoma                                       | Kidney                             |
| 0.549 | 0.016 | NCI-H322M  | Non-small cell lung carcinoma                         | Lung                               |
| 0.530 | 0.001 | CEM-SS     | Childhood T acute lymphoblastic leukemia              | Blood                              |
| 0.539 | 0.013 | M14        | Melanoma                                              | Skin                               |
| 0.537 | 0.014 | U-251      | Glioma                                                | Brain                              |
| 0.509 | 0.001 | SNB-7      | Glioblastoma                                          | Brain                              |
| 0.509 | 0.018 | IGROV-1    | Ovarian adenocarcinoma                                | Ovary                              |
| 0.495 | 0.004 | Raji       | B-lymphoblastic cells                                 | Haematopoietic and lymphoid tissue |
| 0.464 | 0.002 | C8166      | Leukemic T-cells                                      | Blood                              |
| 0.462 | 0.004 | SJSA-1     | Osteosarcoma                                          | Bone                               |
| 0.462 | 0.005 | NALM-6     | Adult B acute lymphoblastic leukemia                  | Haematopoietic and lymphoid tissue |
| 0.457 | 0.004 | T98G       | Glioblastoma                                          | Brain                              |
| 0.471 | 0.019 | YAPC       | Pancreatic carcinoma                                  | Pancreas                           |
| 0.452 | 0.006 | HT-1080    | Fibrosarcoma                                          | Soft tissue                        |
| 0.444 | 0.006 | AGS        | Gastric adenocarcinoma                                | Stomach                            |
| 0.442 | 0.004 | CWR22R     | Prostate carcinoma epithelial cell line               | Prostate                           |
| 0.438 | 0.003 | SW1573     | Lung carcinoma                                        | Lung                               |
| 0.433 | 0.003 | MES-SA/DXS | Uterine corpus sarcoma                                | Uterus                             |
| 0.430 | 0.005 | A-427      | Lung carcinoma                                        | Lung                               |
| 0.470 | 0.044 | SK-MEL-1   | Metastatic melanoma                                   | Skin                               |
| 0.443 | 0.020 | ACHN       | Papillary renal carcinoma                             | Kidney                             |
| 0.426 | 0.013 | H9         | T-lymphoid                                            | Haematopoietic and lymphoid tissue |
| 0.412 | 0.000 | ST-KM-1    | Gastric carcinoma                                     | Stomach                            |
| 0.444 | 0.033 | MDA-MB-453 | Breast adenocarcinoma                                 | Breast                             |
| 0.435 | 0.029 | A498       | Renal carcinoma                                       | Kidney                             |
| 0.407 | 0.008 | PANC-1     | Pancreatic carcinoma                                  | Pancreas                           |
| 0.459 | 0.062 | DMS-114    | Lung carcinoma                                        | Lung                               |
| 0.397 | 0.004 | 5637       | Urothelial bladder carcinoma                          | Urinary tract                      |
| 0.432 | 0.040 | HL-60      | Promyeloblast leukemia                                | Haematopoietic and lymphoid tissue |
| 0.412 | 0.031 | SN12C      | Renal carcinoma                                       | Kidney                             |
| 0.407 | 0.034 | KM12       | Colon adenocarcinoma                                  | Colon                              |
| 0.378 | 0.010 | NCI-H1299  | Non-small cell lung carcinoma                         | Lung                               |
| 0.385 | 0.018 | 8505C      | Thyroid gland undifferentiated (anaplastic) carcinoma | Thyroid                            |
| 0.385 | 0.027 | UACC-62    | Melanoma                                              | Skin                               |
| 0.387 | 0.030 | SF-539     | Glioblastoma                                          | Brain                              |
| 0.356 | 0.008 | BXPC-3     | Pancreatic adenocarcinoma                             | Pancreas                           |

|                                       |       |                            |                                          |                                    |
|---------------------------------------|-------|----------------------------|------------------------------------------|------------------------------------|
| 0.375                                 | 0.036 | NCI-H522                   | Non-small cell lung carcinoma            | Lung                               |
| 0.344                                 | 0.005 | KARPAS-299                 | Anaplastic large cell lymphoma           | Haematopoietic and lymphoid tissue |
| 0.344                                 | 0.006 | MDA-MB-361                 | Breast adenocarcinoma                    | Breast                             |
| 0.345                                 | 0.007 | G-361                      | Melanoma                                 | Skin                               |
| 0.336                                 | 0.002 | COLO 320DM                 | Colon adenocarcinoma                     | Colon                              |
| 0.330                                 | 0.005 | J82                        | Bladder carcinoma                        | Urinary tract                      |
| 0.352                                 | 0.030 | COLO 205                   | Colon adenocarcinoma                     | Colon                              |
| 0.360                                 | 0.042 | RPMI-8226                  | Multiple myeloma                         | Haematopoietic and lymphoid tissue |
| 0.355                                 | 0.042 | OVCAR-3                    | Ovarian adenocarcinoma                   | Ovary                              |
| 0.347                                 | 0.049 | SR                         | Adult immunoblastic lymphoma             | Haematopoietic and lymphoid tissue |
| 0.309                                 | 0.015 | NCI-H69                    | Small cell lung carcinoma                | Lung                               |
| 0.295                                 | 0.005 | U2OS                       | Osteosarcoma                             | Bone                               |
| 0.306                                 | 0.035 | MIA PaCa-2                 | Pancreatic carcinoma                     | Pancreas                           |
| 0.277                                 | 0.008 | NUGC-3                     | Gastric carcinoma                        | Stomach                            |
| 0.333                                 | 0.065 | CAKI-1                     | Kidney carcinoma                         | Kidney                             |
| 0.316                                 | 0.055 | HOP-62                     | Non-small cell lung carcinoma            | Lung                               |
| 0.242                                 | 0.008 | CAOV-3                     | High grade ovarian serous adenocarcinoma | Ovary                              |
| 0.305                                 | 0.071 | HCT-15                     | Colon adenocarcinoma                     | Colon                              |
| 0.279                                 | 0.049 | LOX IMVI                   | Melanoma                                 | Skin                               |
| 0.222                                 | 0.004 | U373 MG                    | Glioblastoma                             | Brain                              |
| 0.223                                 | 0.011 | NCI-N87                    | gastric carcinoma                        | Stomach                            |
| 0.269                                 | 0.073 | SK-MEL-5                   | Melanoma                                 | Skin                               |
| 0.187                                 | 0.002 | KKLS                       | Gastric adenocarcinoma                   | Stomach                            |
| 0.190                                 | 0.005 | MT4                        | Adult T acute lymphoblastic leukemia     | Blood                              |
| 0.261                                 | 0.080 | MDA-MB-468                 | Breast adenocarcinoma                    | Breast                             |
| 0.264                                 | 0.095 | T47D                       | Breast carcinoma                         | Breast                             |
| 0.215                                 | 0.051 | A-431                      | Epidermoid carcinoma                     | Skin                               |
| 0.254                                 | 0.107 | K562                       | Erythroleukemia                          | Haematopoietic and lymphoid tissue |
| 0.163                                 | 0.017 | SNU-638                    | Gastric carcinoma                        | Stomach                            |
| 0.136                                 | 0.004 | NCI-H417                   | Small cell lung carcinoma                | Lung                               |
| 0.121                                 | 0.006 | KATO III<br>stomach cancer | Signet ring cell gastric adenocarcinoma  | Stomach                            |
| 0.145                                 | 0.043 | LNCaP                      | Prostate carcinoma                       | Prostate                           |
| 0.105                                 | 0.004 | CCRF-HSB-2                 | Childhood T acute lymphoblastic leukemia | Blood                              |
| 0.144                                 | 0.044 | SW480                      | Colon adenocarcinoma                     | Colon                              |
| 0.191                                 | 0.092 | Bel-7402                   | Hepatoma                                 | Liver                              |
| 0.256                                 | 0.172 | MCF7                       | Breast carcinoma                         | Breast                             |
| 0.220                                 | 0.149 | Malme-3M                   | Melanoma                                 | Skin                               |
| 0.220                                 | 0.153 | SK-MEL-28                  | Melanoma                                 | Skin                               |
| 0.109                                 | 0.046 | MKN-45                     | Gastric adenocarcinoma                   | Stomach                            |
| 0.083                                 | 0.036 | TSU                        | Prostatic carcinoma                      | Prostate                           |
| 0.046                                 | 0.005 | CEM-c113                   | Childhood T acute lymphoblastic leukemia | Blood                              |
| 0.171                                 | 0.133 | St-4                       | Stomach carcinoma                        | Stomach                            |
| 0.187                                 | 0.151 | SF-295                     | Glioblastoma                             | Brain                              |
| 0.191                                 | 0.156 | SK-OV-3                    | Ovarian carcinoma                        | Ovary                              |
| 0.106                                 | 0.085 | Huh-7                      | Hepatocellular carcinoma                 | Liver                              |
| 0.216                                 | 0.201 | A549                       | Lung carcinoma                           | Lung                               |
| 0.133                                 | 0.120 | LoVo                       | Colon adenocarcinoma                     | Colon                              |
| 0.116                                 | 0.106 | DLD-1                      | Colon adenocarcinoma                     | Colon                              |
| <b>gemcitabine, normal cell lines</b> |       |                            |                                          |                                    |
| 0.528                                 | 0.004 | BJ                         | Foreskin fibroblast                      | Foreskin                           |
| 0.362                                 | 0.004 | NHDF                       | Fibroblast                               | Skin                               |
| 0.321                                 | 0.021 | HEL 299                    | Fibroblast                               | Lung                               |
| 0.169                                 | 0.039 | HUVEC                      | Umbilical vein endothelial cell          | Endothelium                        |
| 0.163                                 | 0.039 | HFF                        | Foreskin fibroblast                      | Skin                               |
| <b>raloxifene, cancer cell lines</b>  |       |                            |                                          |                                    |
| 0.865                                 | 0.006 | MCF7                       | Breast carcinoma                         | Breast                             |
| 0.336                                 | 0.065 | MOLT-4                     | Acute T-lymphoblastic leukemia           | Blood                              |

|                                              |       |                   |                                                       |                                    |
|----------------------------------------------|-------|-------------------|-------------------------------------------------------|------------------------------------|
| 0.323                                        | 0.005 | U2OS              | Osteosarcoma                                          | Bone                               |
| 0.294                                        | 0.074 | HeLa              | Cervical adenocarcinoma                               | Cervix                             |
| 0.227                                        | 0.157 | HT-29             | Colon adenocarcinoma                                  | Colon                              |
| 0.227                                        | 0.196 | PC-9              | Lung adenocarcinoma                                   | Lung                               |
| 0.225                                        | 0.130 | K562              | Erythroleukemia                                       | Haematopoietic and lymphoid tissue |
| 0.217                                        | 0.198 | Hs-578T           | Invasive ductal breast carcinoma                      | Breast                             |
| 0.208                                        | 0.116 | CCRF-CEM          | Childhood T acute lymphoblastic leukemia              | Blood                              |
| 0.169                                        | 0.004 | Ishikawa          | Endometrial adenocarcinoma                            | Uterus                             |
| 0.161                                        | 0.110 | Ramos             | Burkitts lymphoma B-cells                             | Blood                              |
| 0.157                                        | 0.122 | Caco-2            | Colon adenocarcinoma                                  | Colon                              |
| 0.156                                        | 0.043 | MES-SA/DXS        | Uterine corpus sarcoma                                | Uterus                             |
| 0.153                                        | 0.046 | HOS-TE85          | Osteosarcoma                                          | Bone                               |
| 0.145                                        | 0.028 | MES-SA            | Uterine corpus sarcoma                                | Uterus                             |
| 0.107                                        | 0.038 | SQ20B             | Head and neck Squamous carcinoma                      | Head and neck                      |
| 0.095                                        | 0.083 | MKN-45            | Gastric adenocarcinoma                                | Stomach                            |
| 0.064                                        | 0.062 | MCF7S             | Breast carcinoma                                      | Breast                             |
| 0.045                                        | 0.022 | HA22T             | Hepatocellular carcinoma                              | Liver                              |
| 0.039                                        | 0.015 | CEM-0             | T-cell leukemia                                       | Blood                              |
| 0.031                                        | 0.014 | CCRF-CEM/VCR-1000 | T-cell leukaemia                                      | Blood                              |
| 0.024                                        | 0.019 | GC3/CI            | Colorectal carcinoma                                  | Colon                              |
| 0.021                                        | 0.017 | HRT-18            | Colon adenocarcinoma                                  | Colon                              |
| <b><i>raloxifene, normal cell lines</i></b>  |       |                   |                                                       |                                    |
| 0.104                                        | 0.046 | Detroit 551       | Embryonic skin                                        | Skin                               |
| 0.087                                        | 0.065 | CRL-7065          | Fibroblast                                            | Skin                               |
| <b><i>vinorelbine, cancer cell lines</i></b> |       |                   |                                                       |                                    |
| 0.931                                        | 0.005 | A549              | Lung carcinoma                                        | Lung                               |
| 0.896                                        | 0.005 | HCT-116           | Colon carcinoma                                       | Colon                              |
| 0.842                                        | 0.004 | PC-6              | Small cell lung carcinoma                             | Lung                               |
| 0.802                                        | 0.005 | HeLa              | Cervical adenocarcinoma                               | Cervix                             |
| 0.689                                        | 0.008 | NCI-H838          | Non-small cell lung cancer. 3 stage                   | Lung                               |
| 0.635                                        | 0.007 | DMS-114           | Lung carcinoma                                        | Lung                               |
| 0.619                                        | 0.005 | Kasumi 1          | Childhood acute myeloid leukemia with maturation      | Haematopoietic and lymphoid tissue |
| 0.597                                        | 0.005 | SK-MEL-1          | Metastatic melanoma                                   | Skin                               |
| 0.580                                        | 0.004 | NCI-H295R         | Adrenal cortex carcinoma                              | Adrenal cortex                     |
| 0.544                                        | 0.004 | PA-1              | Ovarian carcinoma                                     | Ovary                              |
| 0.526                                        | 0.005 | MDA-MB-453        | Breast adenocarcinoma                                 | Breast                             |
| 0.519                                        | 0.005 | YAPC              | Pancreatic carcinoma                                  | Pancreas                           |
| 0.518                                        | 0.009 | A2058             | Melanoma                                              | Skin                               |
| 0.501                                        | 0.014 | NCI-H187          | Small cell lung carcinoma                             | Lung                               |
| 0.490                                        | 0.009 | U-266             | Plasma cell myeloma                                   | Blood                              |
| 0.452                                        | 0.021 | CFPAC-1           | Pancreatic carcinoma                                  | Pancreas                           |
| 0.425                                        | 0.005 | SJSA-1            | Osteosarcoma                                          | Bone                               |
| 0.420                                        | 0.000 | HCT-116/VM46      | Colon carcinoma                                       | Colon                              |
| 0.420                                        | 0.013 | SK-MES-1          | Squamous cell lung carcinoma                          | Lung                               |
| 0.413                                        | 0.008 | T98G              | Glioblastoma                                          | Brain                              |
| 0.412                                        | 0.022 | RKO               | Colon carcinoma                                       | Colon                              |
| 0.406                                        | 0.026 | NALM-6            | Adult B acute lymphoblastic leukemia                  | Haematopoietic and lymphoid tissue |
| 0.401                                        | 0.008 | HuP-T3            | Pancreatic adenocarcinoma                             | Pancreas                           |
| 0.371                                        | 0.019 | HOS               | Osteosarcoma                                          | Bone                               |
| 0.356                                        | 0.025 | 8505C             | Thyroid gland undifferentiated (anaplastic) carcinoma | Thyroid                            |
| 0.347                                        | 0.012 | C8166             | Leukemic T-cells                                      | Blood                              |
| 0.343                                        | 0.013 | CWR22R            | Prostate carcinoma epithelial cell line               | Prostate                           |
| 0.340                                        | 0.005 | KARPAS-299        | Anaplastic large cell lymphoma                        | Haematopoietic and lymphoid tissue |
| 0.329                                        | 0.025 | 5637              | Urothelial bladder carcinoma                          | Urinary tract                      |
| 0.319                                        | 0.086 | OVCAR-5           | Ovarian adenocarcinoma                                | Ovary                              |
| 0.313                                        | 0.031 | AGS               | Gastric adenocarcinoma                                | Stomach                            |
| 0.300                                        | 0.034 | NCI-H1299         | Non-small cell lung carcinoma                         | Lung                               |

|                                              |       |            |                                          |                                    |
|----------------------------------------------|-------|------------|------------------------------------------|------------------------------------|
| 0.297                                        | 0.119 | UACC-257   | Melanoma                                 | Skin                               |
| 0.296                                        | 0.024 | NCI-H69    | Small cell lung carcinoma                | Lung                               |
| 0.293                                        | 0.025 | A-427      | Lung carcinoma                           | Lung                               |
| 0.283                                        | 0.086 | H9         | T-lymphoid                               | Haematopoietic and lymphoid tissue |
| 0.279                                        | 0.031 | MDA-MB-361 | Breast adenocarcinoma                    | Breast                             |
| 0.274                                        | 0.034 | G-361      | Melanoma                                 | Skin                               |
| 0.266                                        | 0.026 | T-24       | Bladder carcinoma                        | Urinary tract                      |
| 0.261                                        | 0.177 | OVCAR-4    | Ovarian adenocarcinoma                   | Ovary                              |
| 0.260                                        | 0.046 | Raji       | B-lymphoblastic cells                    | Haematopoietic and lymphoid tissue |
| 0.252                                        | 0.004 | PT-45      | Pancreatic carcinoma                     | Pancreas                           |
| 0.244                                        | 0.025 | J82        | Bladder carcinoma                        | Urinary tract                      |
| 0.243                                        | 0.174 | HOP-92     | Non-small cell lung carcinoma            | Lung                               |
| 0.242                                        | 0.141 | UO-31      | Renal carcinoma                          | Kidney                             |
| 0.230                                        | 0.012 | ZR-75-1    | Breast carcinoma                         | Breast                             |
| 0.225                                        | 0.161 | NCI-H226   | Non-small cell lung carcinoma            | Lung                               |
| 0.224                                        | 0.063 | HT-1080    | Fibrosarcoma                             | Soft tissue                        |
| 0.220                                        | 0.017 | SW1573     | Lung carcinoma                           | Lung                               |
| 0.217                                        | 0.021 | SMMC-7721  | Hepatocellular carcinoma                 | Liver                              |
| 0.210                                        | 0.011 | CAOV-3     | High grade ovarian serous adenocarcinoma | Ovary                              |
| 0.193                                        | 0.046 | NUGC-3     | Gastric carcinoma                        | Stomach                            |
| 0.183                                        | 0.105 | MIA PaCa-2 | Pancreatic carcinoma                     | Pancreas                           |
| 0.170                                        | 0.028 | MES-SA/DXS | Uterine corpus sarcoma                   | Uterus                             |
| 0.169                                        | 0.090 | NCI-N87    | gastric carcinoma                        | Stomach                            |
| 0.124                                        | 0.018 | SNU-398    | Hepatocellular carcinoma                 | Liver                              |
| 0.109                                        | 0.074 | Huh-7      | Hepatocellular carcinoma                 | Liver                              |
| 0.097                                        | 0.053 | SiHa       | Cervical squamous cell carcinoma         | Cervix                             |
| <b><i>vinorelbine, normal cell lines</i></b> |       |            |                                          |                                    |
| 0.993                                        | 0.003 | HUVEC      | Umbilical vein endothelial cell          | Endothelium                        |
| 0.313                                        | 0.045 | MRC5       | Embryonic lung fibroblast                | Lung                               |
